# Supplementary material for: The influence of (H2O)1–2 in the HOBr + HO2 gas-phase reaction
Source: Royal Society of Chemistry journal article supplement (doi:10.1039/d2ra06204f), 2022-01-01
Supplement: d2ra06204f1.pdf [file d2ra06204f1.pdf]

# The influence of $(\text{H}_2\text{O})_{1-2}$ in the $\text{HOBr} + \text{HO}_2$ Gas-Phase Reaction

Yunju Zhang<sup>1\*,2</sup>, Yongguo Liu<sup>2</sup>, Meilian Zhao,<sup>3</sup> Yuxi Sun<sup>1</sup>, Shuxin Liu<sup>1\*</sup>

*<sup>1</sup>Key Laboratory of Photoinduced Functional Materials, Key Laboratory of Inorganic Materials Preparation and Synthesis, Mianyang Normal University, Mianyang 621000, PR China*

*<sup>2</sup>Beijing Key Laboratory of Flavor Chemistry, Beijing Technology and Business University (BTBU), 100048 Beijing, People's*

*<sup>3</sup>College of Medical Technology, Chengdu University of Traditional Chinese Medicine Liutai Avenue, Wenjiang District ChengDu PR China*

---

<sup>1\*</sup> Corresponding author. Email address: [zhangyj010@nenu.edu.cn](mailto:zhangyj010@nenu.edu.cn) Tel.: +86 816 2200064; Fax: +86 816 2200819

The expression equation for calculating the rate constants of the reactions. The concentration of the particular catalyst is considered and the catalytic effect of the catalyst on the reaction is measured by the effective rate constant. The specific calculation formula is as follows:

In fact, for the HOBr + HO<sub>2</sub> reaction without catalyst, it can occur according to the two-step mechanism proposed in equation 1 and 2:

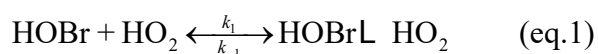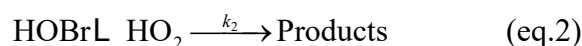

If  $k_1$  and  $k_{-1}$  are the forward and reverse rate constants for the first step, respectively, and  $k_2$  corresponds to the second step, the rate constant for this process is shown by eq.3 according to the steady-state conditions.

$$k = \frac{k_1 k_2}{k_{-1} + k_2} \quad (\text{eq.3})$$

Due to the very loose transition state, the entropy change in  $k_{-1}$  is much larger than in the formation of products. Therefore,  $k_{-1}$  is considerably larger than  $k_2$ ,<sup>1-4</sup> and a pseudo

equilibrium assumption can be used in the formation of the reactant complex. Hence, eq.3 can be represented as

$$k = \frac{k_1}{k_{-1} + k_2} k_2 = k_{eq} k_2 \quad (\text{eq.4})$$

where  $K_{eq}$  and  $k_2$  are the equilibrium constant of the first step and the rate constant of the second step in the reactions, and they can be displayed by eq. 5 and 6, respectively.

$$k_{eq} = \frac{\sigma Q_{R_1 L R_2}}{Q_{R_1} Q_{R_2}} \exp\left(\frac{E_{\text{HOBr}+\text{HO}_2} - E_{\text{HOBrL HO}_2}}{RT}\right) \quad (\text{eq.5})$$

$$k_2 = \frac{\kappa \sigma Q_{TS}}{\beta h Q_{RC}} \exp\left(-\frac{E_{TS} - E_{\text{HOBrL HO}_2}}{RT}\right) \quad (\text{eq.6})$$

The total rate constant  $k$  can be obtained as

$$k = k_2 \frac{\sigma Q_{R_1 L R_2}}{Q_{R_1} Q_{R_2}} \exp\left(\frac{E_{\text{HOBr}+\text{HO}_2} - E_{\text{HOBrL HO}_2}}{RT}\right) \quad (\text{eq.7})$$

where  $\sigma$  is the symmetry factor;  $\beta$  equals the reciprocal of Boltzmann's constant;  $h$  is Planck's constant;  $\kappa$  is the tunneling factor;  $Q_{ER}$  and  $Q_{TS}$  are partition functions for the reactant complexes and transition state, respectively.

**Table S1.** Calculated equilibrium coefficients for the generation of the HO<sub>2</sub>⋯H<sub>2</sub>O, H<sub>2</sub>O⋯HOBr, HOBr⋯H<sub>2</sub>O and 2H<sub>2</sub>O⋯HO<sub>2</sub> (cm<sup>3</sup> molecule<sup>-1</sup>) in the temperature range of 216.7-298.2 K.

| $T$    | $K_{\text{eq}(\text{H}_2\text{O} \cdots \text{HO}_2)}$ | $K_{\text{eq}(\text{H}_2\text{O} \cdots \text{HOBr})}$ | $K_{\text{eq}(\text{HOBr} \cdots \text{H}_2\text{O})}$ | $K_{\text{eq}(2\text{H}_2\text{O} \cdots \text{HO}_2)}$ |
|--------|--------------------------------------------------------|--------------------------------------------------------|--------------------------------------------------------|---------------------------------------------------------|
| 298.15 | $3.78 \times 10^{-21}$                                 | $7.47 \times 10^{-22}$                                 | $1.62 \times 10^{-24}$                                 | $8.15 \times 10^{-31}$                                  |
| 288.19 | $5.91 \times 10^{-21}$                                 | $1.07 \times 10^{-21}$                                 | $1.93 \times 10^{-24}$                                 | $8.98 \times 10^{-31}$                                  |

|        |                        |                        |                        |                        |
|--------|------------------------|------------------------|------------------------|------------------------|
| 275.21 | $1.11 \times 10^{-20}$ | $1.77 \times 10^{-21}$ | $2.49 \times 10^{-24}$ | $1.03 \times 10^{-30}$ |
| 262.23 | $2.23 \times 10^{-20}$ | $3.08 \times 10^{-21}$ | $3.29 \times 10^{-24}$ | $1.20 \times 10^{-30}$ |
| 249.25 | $4.80 \times 10^{-20}$ | $5.69 \times 10^{-21}$ | $4.48 \times 10^{-24}$ | $1.41 \times 10^{-30}$ |
| 236.27 | $1.12 \times 10^{-19}$ | $1.12 \times 10^{-20}$ | $6.30 \times 10^{-24}$ | $1.70 \times 10^{-30}$ |
| 223.29 | $2.91 \times 10^{-19}$ | $2.40 \times 10^{-20}$ | $9.23 \times 10^{-24}$ | $2.08 \times 10^{-30}$ |
| 216.69 | $4.92 \times 10^{-19}$ | $3.66 \times 10^{-20}$ | $1.14 \times 10^{-23}$ | $2.33 \times 10^{-30}$ |

---

**Table S2.** Computed equilibrium coefficients for the generation of the COMR1, COMRW1, COMRW2, COMRW3, COMRW4, COMRW5 and COMRWW2 respectively ( $\text{cm}^3\text{molecule}^{-1}$ ) in the temperature range of 216.7-298.2 K

| $T$    | $k_{\text{COMR1}}$     | $k_{\text{COMRW1}}$    | $k_{\text{COMRW2}}$    | $k_{\text{COMRW3}}$    | $k_{\text{COMRW4}}$    | $k_{\text{COMRW5}}$    | $k_{\text{COMRWW2}}$   |
|--------|------------------------|------------------------|------------------------|------------------------|------------------------|------------------------|------------------------|
| 298.15 | $9.05 \times 10^{-24}$ | $1.15 \times 10^{-22}$ | $5.73 \times 10^{-22}$ | $6.40 \times 10^{-24}$ | $2.81 \times 10^{-21}$ | $4.37 \times 10^{-24}$ | $4.01 \times 10^{-23}$ |
| 288.19 | $1.15 \times 10^{-23}$ | $1.59 \times 10^{-22}$ | $1.01 \times 10^{-21}$ | $8.02 \times 10^{-24}$ | $5.43 \times 10^{-21}$ | $5.35 \times 10^{-24}$ | $6.61 \times 10^{-23}$ |
| 275.21 | $1.60 \times 10^{-23}$ | $2.54 \times 10^{-22}$ | $2.25 \times 10^{-21}$ | $1.10 \times 10^{-23}$ | $1.38 \times 10^{-20}$ | $7.14 \times 10^{-24}$ | $1.34 \times 10^{-22}$ |
| 262.23 | $2.32 \times 10^{-23}$ | $4.23 \times 10^{-22}$ | $5.41 \times 10^{-21}$ | $1.57 \times 10^{-23}$ | $3.85 \times 10^{-20}$ | $9.81 \times 10^{-24}$ | $2.93 \times 10^{-22}$ |
| 249.25 | $3.48 \times 10^{-23}$ | $7.44 \times 10^{-22}$ | $1.43 \times 10^{-20}$ | $2.31 \times 10^{-23}$ | $1.19 \times 10^{-19}$ | $1.39 \times 10^{-23}$ | $6.88 \times 10^{-22}$ |
| 236.27 | $5.47 \times 10^{-23}$ | $1.39 \times 10^{-21}$ | $4.20 \times 10^{-20}$ | $3.56 \times 10^{-23}$ | $4.19 \times 10^{-19}$ | $2.05 \times 10^{-23}$ | $1.78 \times 10^{-21}$ |
| 223.29 | $9.06 \times 10^{-23}$ | $2.80 \times 10^{-21}$ | $1.40 \times 10^{-20}$ | $5.76 \times 10^{-23}$ | $1.70 \times 10^{-18}$ | $3.17 \times 10^{-23}$ | $5.18 \times 10^{-21}$ |

|        |                      |                      |                      |                        |                        |                        |                      |
|--------|----------------------|----------------------|----------------------|------------------------|------------------------|------------------------|----------------------|
|        | 23                   | 21                   | 19                   |                        |                        |                        | 21                   |
| 216.69 | $1.20 \times 10^{-}$ | $4.13 \times 10^{-}$ | $2.72 \times 10^{-}$ |                        |                        |                        | $9.29 \times 10^{-}$ |
|        | 22                   | 21                   | 19                   | $7.52 \times 10^{-23}$ | $3.71 \times 10^{-18}$ | $4.02 \times 10^{-23}$ | 21                   |

---

$K_{eq}(\text{COMR1})$ ,  $K_{eq}(\text{COMRW1})$ ,  $K_{eq}(\text{COMRW2})$ ,  $K_{eq}(\text{COMRW3})$ ,  $K_{eq}(\text{COMRW4})$ ,  $K_{eq}(\text{COMRW5})$  and  $K_{eq}(\text{COMRWW2})$  are the computed equilibrium constants for the formation of binary complexes COMR1, COMRW1, COMRW2, COMRW3, COMRW4, COMRW5 and COMRWW2, respectively.

**Table S3.** Calculated equilibrium coefficients for the generation of the  $\text{H}_2\text{O} \cdots \text{H}_2\text{O}_2$ ,  $\text{H}_2\text{O} \cdots \text{BrO}$ ,  $\text{BrO} \cdots \text{H}_2\text{O}$  and  $2\text{H}_2\text{O} \cdots \text{HO}_2$  ( $\text{cm}^3 \text{ molecule}^{-1}$ ) in the temperature range of 216.7-298.2 K.

---

| $T$ | $K_{eq}(\text{H}_2\text{OL H}_2\text{O}_2)$ | $K_{eq}(\text{H}_2\text{OL BrO})$ | $K_{eq}(\text{BrOL H}_2\text{O})$ | $K_{eq}(2\text{H}_2\text{OL HO}_2)$ |
|-----|---------------------------------------------|-----------------------------------|-----------------------------------|-------------------------------------|
|-----|---------------------------------------------|-----------------------------------|-----------------------------------|-------------------------------------|

---

---

|        |                        |                        |                        |                        |
|--------|------------------------|------------------------|------------------------|------------------------|
| 298.15 | $7.99 \times 10^{-21}$ | $1.82 \times 10^{-23}$ | $7.27 \times 10^{-24}$ | $8.15 \times 10^{-31}$ |
| 288.19 | $1.11 \times 10^{-20}$ | $2.12 \times 10^{-23}$ | $9.15 \times 10^{-24}$ | $8.98 \times 10^{-31}$ |
| 275.21 | $1.76 \times 10^{-20}$ | $2.62 \times 10^{-23}$ | $1.26 \times 10^{-23}$ | $1.03 \times 10^{-30}$ |
| 262.23 | $2.93 \times 10^{-20}$ | $3.31 \times 10^{-23}$ | $1.81 \times 10^{-23}$ | $1.20 \times 10^{-30}$ |
| 249.25 | $5.14 \times 10^{-20}$ | $4.29 \times 10^{-23}$ | $2.68 \times 10^{-23}$ | $1.41 \times 10^{-30}$ |
| 236.27 | $9.58 \times 10^{-20}$ | $5.71 \times 10^{-23}$ | $4.14 \times 10^{-23}$ | $1.70 \times 10^{-30}$ |
| 223.29 | $1.92 \times 10^{-19}$ | $7.87 \times 10^{-23}$ | $6.74 \times 10^{-23}$ | $2.08 \times 10^{-30}$ |
| 216.69 | $2.83 \times 10^{-19}$ | $9.40 \times 10^{-23}$ | $8.82 \times 10^{-23}$ | $2.33 \times 10^{-30}$ |

---



**Table S4.** Computed equilibrium coefficients for the generation of the COMP1, COMPW1, COMPW2, COMPW3 and COMPW5, respectively ( $\text{cm}^3\text{molecule}^{-1}$ ) in the temperature range of 216.7-298.2 K

| $T$    | $k_{\text{COMP1}}$     | $k_{\text{COMPW1}}$    | $k_{\text{COMPW2}}$    | $k_{\text{COMPW3}}$    | $k_{\text{COMPW5}}$    |
|--------|------------------------|------------------------|------------------------|------------------------|------------------------|
| 298.15 | $1.54 \times 10^{-23}$ | $3.52 \times 10^{-23}$ | $3.63 \times 10^{-23}$ | $8.57 \times 10^{-23}$ | $2.08 \times 10^{-23}$ |
| 288.19 | $1.94 \times 10^{-23}$ | $5.04 \times 10^{-23}$ | $4.84 \times 10^{-23}$ | $1.37 \times 10^{-22}$ | $2.70 \times 10^{-23}$ |
| 275.21 | $2.66 \times 10^{-23}$ | $8.34 \times 10^{-23}$ | $7.29 \times 10^{-23}$ | $2.65 \times 10^{-22}$ | $3.92 \times 10^{-23}$ |
| 262.23 | $3.79 \times 10^{-23}$ | $1.45 \times 10^{-22}$ | $1.14 \times 10^{-22}$ | $5.47 \times 10^{-22}$ | $5.91 \times 10^{-23}$ |
| 249.25 | $5.59 \times 10^{-23}$ | $2.68 \times 10^{-22}$ | $1.88 \times 10^{-22}$ | $1.22 \times 10^{-21}$ | $9.28 \times 10^{-23}$ |
| 236.27 | $8.60 \times 10^{-23}$ | $5.28 \times 10^{-22}$ | $3.25 \times 10^{-22}$ | $2.97 \times 10^{-21}$ | $1.53 \times 10^{-22}$ |
| 223.29 | $1.39 \times 10^{-22}$ | $1.12 \times 10^{-21}$ | $6.01 \times 10^{-22}$ | $8.02 \times 10^{-21}$ | $2.68 \times 10^{-22}$ |

$$\begin{array}{cccccc}
 & 1.82 \times 10^{-22} & 1.71 \times 10^{-21} & 8.45 \times 10^{-22} & & \\
 216.69 & & & & 1.39 \times 10^{-20} & 3.66 \times 10^{-22}
 \end{array}$$

---

$K_{eq}(\text{COMP1})$ ,  $K_{eq}(\text{COMPW1})$ ,  $K_{eq}(\text{COMPW2})$ ,  $K_{eq}(\text{COMPW3})$  and  $K_{eq}(\text{COMPW5})$  are the computed equilibrium constants for the formation of binary complexes COMP1, COMPW1, COMPW2, COMPW3 and COMPW5, respectively.

**Table S5:** The reverse rate constants of the HO<sub>2</sub>+ HOBr reaction without water, a single water molecule and two water molecules in the temperature range of 216.7-298.2 K at different heights in the earth atmosphere.

| h(km) | $T$    | $k_{\text{TS1}}$       | $k_{\text{TS1W1}}''$   | $k_{\text{TS1W2}}''$   | $k_{\text{TS1W3A}}''$  | $k_{\text{TS1W3B}}''$  | $k_{\text{TS1W4}}''$   | $k_{\text{TS1W5}}''$   | $k_{\text{TS1WW2}}''$  |
|-------|--------|------------------------|------------------------|------------------------|------------------------|------------------------|------------------------|------------------------|------------------------|
| 0     | 298.15 | $4.94 \times 10^{-21}$ | $5.60 \times 10^{-17}$ | $4.50 \times 10^{-20}$ | $3.19 \times 10^{-29}$ | $1.68 \times 10^{-31}$ | $7.34 \times 10^{-18}$ | $2.74 \times 10^{-19}$ | $8.32 \times 10^{-22}$ |
| 0     | 288.19 | $2.99 \times 10^{-21}$ | $4.74 \times 10^{-17}$ | $3.03 \times 10^{-20}$ | $1.26 \times 10^{-29}$ | $5.41 \times 10^{-32}$ | $6.03 \times 10^{-18}$ | $1.91 \times 10^{-19}$ | $5.90 \times 10^{-22}$ |
| 2     | 275.21 | $1.45 \times 10^{-21}$ | $3.76 \times 10^{-17}$ | $1.76 \times 10^{-20}$ | $3.42 \times 10^{-30}$ | $1.09 \times 10^{-32}$ | $4.59 \times 10^{-18}$ | $1.15 \times 10^{-19}$ | $3.64 \times 10^{-22}$ |
| 4     | 262.23 | $6.63 \times 10^{-22}$ | $2.91 \times 10^{-17}$ | $9.60 \times 10^{-21}$ | $8.10 \times 10^{-31}$ | $1.88 \times 10^{-33}$ | $3.41 \times 10^{-18}$ | $6.56 \times 10^{-20}$ | $2.16 \times 10^{-22}$ |
| 6     | 249.25 | $2.80 \times 10^{-22}$ | $2.22 \times 10^{-17}$ | $4.98 \times 10^{-21}$ | $1.67 \times 10^{-31}$ | $2.72 \times 10^{-34}$ | $2.48 \times 10^{-18}$ | $3.56 \times 10^{-20}$ | $1.20 \times 10^{-22}$ |
| 8     | 236.27 | $1.08 \times 10^{-22}$ | $1.64 \times 10^{-17}$ | $2.39 \times 10^{-21}$ | $2.91 \times 10^{-32}$ | $3.18 \times 10^{-35}$ | $1.74 \times 10^{-18}$ | $1.80 \times 10^{-20}$ | $6.34 \times 10^{-23}$ |
| 10    | 223.29 | $3.70 \times 10^{-23}$ | $1.16 \times 10^{-17}$ | $1.06 \times 10^{-21}$ | $4.14 \times 10^{-33}$ | $2.92 \times 10^{-36}$ | $1.18 \times 10^{-18}$ | $8.47 \times 10^{-21}$ | $3.13 \times 10^{-23}$ |

|    |        |                        |                        |                        |                        |                        |                        |                        |                        |
|----|--------|------------------------|------------------------|------------------------|------------------------|------------------------|------------------------|------------------------|------------------------|
| 12 | 216.69 | $2.06 \times 10^{-23}$ | $9.73 \times 10^{-18}$ | $6.78 \times 10^{-22}$ | $1.40 \times 10^{-33}$ | $7.76 \times 10^{-37}$ | $9.59 \times 10^{-19}$ | $5.60 \times 10^{-21}$ | $2.10 \times 10^{-23}$ |
|----|--------|------------------------|------------------------|------------------------|------------------------|------------------------|------------------------|------------------------|------------------------|

---

**Table S6:** Effective reverse rate constants for the  $\text{HO}_2 + \text{HOBr} + \text{H}_2\text{O}$  and  $\text{HO}_2 + \text{HOBr} + 2\text{H}_2\text{O}$  reactions in the temperature range of 216.69-298.15 K ( $\text{cm}^3 \text{ molecule}^{-1} \text{ s}^{-1}$ ) at different heights in the earth atmosphere.

| h(km) | $T$    | $[\text{H}_2\text{O}]$ | $[\text{H}_2\text{O}]_2$ | $k_{\text{TS1W1}}'''$  | $k_{\text{TS1W2}}'''$  | $k_{\text{TS1W3A}}'''$ | $k_{\text{TS1W3B}}'''$ | $k_{\text{TS1W4}}'''$  | $k_{\text{TS1W5}}'''$  | $k_{\text{TS1WW2}}'''$ |
|-------|--------|------------------------|--------------------------|------------------------|------------------------|------------------------|------------------------|------------------------|------------------------|------------------------|
| 0     | 298.15 | $7.79 \times 10^{17}$  | $3.1 \times 10^{14}$     | $6.72 \times 10^{-22}$ | $2.80 \times 10^{-22}$ | $4.52 \times 10^{-34}$ | $2.38 \times 10^{-36}$ | $2.16 \times 10^{-20}$ | $1.55 \times 10^{-24}$ | $2.10 \times 10^{-37}$ |
| 0     | 288.19 | $4.34 \times 10^{17}$  | $1.2 \times 10^{14}$     | $3.99 \times 10^{-22}$ | $1.46 \times 10^{-22}$ | $1.16 \times 10^{-34}$ | $4.98 \times 10^{-37}$ | $1.55 \times 10^{-20}$ | $7.58 \times 10^{-25}$ | $6.36 \times 10^{-38}$ |

|    |        |                       |                      |                        |                        |                        |                        |                        |                        |                        |
|----|--------|-----------------------|----------------------|------------------------|------------------------|------------------------|------------------------|------------------------|------------------------|------------------------|
| 2  | 275.21 | $1.89 \times 10^{17}$ | $2.8 \times 10^{13}$ | $1.89 \times 10^{-22}$ | $5.85 \times 10^{-23}$ | $1.69 \times 10^{-35}$ | $5.40 \times 10^{-38}$ | $9.63 \times 10^{-21}$ | $2.74 \times 10^{-25}$ | $1.05 \times 10^{-38}$ |
| 4  | 262.23 | $7.43 \times 10^{16}$ | $5.7 \times 10^{12}$ | $8.19 \times 10^{-23}$ | $2.09 \times 10^{-23}$ | $1.99 \times 10^{-36}$ | $4.62 \times 10^{-39}$ | $5.65 \times 10^{-21}$ | $8.82 \times 10^{-26}$ | $1.48 \times 10^{-39}$ |
| 6  | 249.25 | $2.64 \times 10^{16}$ | $9.6 \times 10^{11}$ | $3.28 \times 10^{-23}$ | $6.76 \times 10^{-24}$ | $1.89 \times 10^{-37}$ | $3.08 \times 10^{-40}$ | $3.14 \times 10^{-21}$ | $2.52 \times 10^{-26}$ | $1.62 \times 10^{-40}$ |
| 8  | 236.27 | $8.15 \times 10^{15}$ | $1.3 \times 10^{11}$ | $1.15 \times 10^{-23}$ | $1.87 \times 10^{-24}$ | $1.35 \times 10^{-38}$ | $1.48 \times 10^{-41}$ | $1.59 \times 10^{-21}$ | $6.07 \times 10^{-27}$ | $1.40 \times 10^{-41}$ |
| 10 | 223.29 | $2.15 \times 10^{15}$ | $1.3 \times 10^{10}$ | $3.47 \times 10^{-24}$ | $4.38 \times 10^{-25}$ | $7.00 \times 10^{-40}$ | $4.94 \times 10^{-43}$ | $7.38 \times 10^{-22}$ | $1.23 \times 10^{-27}$ | $8.46 \times 10^{-43}$ |
| 12 | 216.69 | $1.01 \times 10^{15}$ | $3.7 \times 10^9$    | $1.79 \times 10^{-24}$ | $1.94 \times 10^{-25}$ | $1.33 \times 10^{-40}$ | $7.37 \times 10^{-44}$ | $4.77 \times 10^{-22}$ | $4.99 \times 10^{-28}$ | $1.81 \times 10^{-43}$ |

---



## References

- [1] D. L. Singleton, R. J. Cvetanovic, Temperature Dependence of  $\text{CH}_3\text{O}_2\cdot + \text{HO}_2\cdot \rightarrow \text{CH}_3\text{O}_2\text{H} + \text{O}_2$  reaction in the gas phase. Computational Evidence for the Formation of a Hydrogen-Bonded Diradical Complex. *J. Phys. Chem. A* 110(2006)6073–6082.
- [2] A. Galano, J. R. Alvarez-Idaboy, M. E. Ruiz-Santoyo, A. Vivier-Bunge, Glycolaldehyde + OH Gas Phase Reaction: A Quantum Chemistry + CVT/SCT Approach. *J. Phys. Chem. A* 109(2005)169–180.
- [3] J. R. Alvarez-Idaboy, N. Mora-Diez, A. Vivier-Bunge, A Quantum Chemical and Classical Transition State Theory Explanation of Negative Activation Energies in OH Addition to Substituted Ethenes. *J. Am. Chem. Soc.* 122(2000)3715–3720.
- [4] H. Sun, C. K. Law, Kinetics of Hydrogen Abstraction Reactions of Butene Isomers by OH Radical. *J. Phys. Chem. A* 114(2010)12088–12098.
- [5] J. M. Anglada, R. Crehuet, M. Martins-Costa, J. S. Francisco, M. Ruiz-Lopez, The atmospheric oxidation of  $\text{CH}_3\text{OOH}$  by the OH radical: The effect of water vapor. *Phys. Chem. Chem. Phys.* 19(2017)12331–12342.
- [6] P. R. Lowe, An approximating polynomial for the computation of saturation vapor pressure. *J. Appl. Meteorol.* 16(1977)100-103.
